# Supplementary material
Source: PubMed Central journal article supplement (PMC6958516)
Supplement: NIHMS1044588-supplement-SI_Materials.pdf [file NIHMS1044588-supplement-SI_Materials.pdf]

# CoSIMS: An Optimized Trajectory Based Collision Simulator for Ion Mobility Spectrometry

## SUPPORTING INFORMATION

Christopher A. Myers,<sup>a</sup> Rebecca J. D’Esposito,<sup>b</sup> Daniele Fabris,<sup>bcd</sup>  
Srivathsan V. Ranganathan,<sup>c</sup> and Alan A. Chen<sup>\*bc</sup>

<sup>a</sup> *Department of Physics, University at Albany (SUNY), New York, USA.*

<sup>b</sup> *Department of Chemistry, University at Albany (SUNY), Albany, New York, USA.*

<sup>c</sup> *The RNA Institute, University at Albany (SUNY), New York, USA.*

<sup>d</sup> *Department of Biological Sciences, University at Albany (SUNY), New York, USA.*

### S1 Introduction

In the following sections, details of numerical algorithms implemented into CoSIMS will be presented. First, a more detailed derivation of these methods will be discussed followed by some parameterization results and CPU benchmarks. The final section of this document contains tabulated data for many of the plots included either here or in the main text.

### S2 Determining the atomic clusters

Before either the multipole or dispersion cut-off approximations can be applied, all of the atoms in the ion must be separated into clusters. Clustering allows CoSIMS to efficiently search for atoms that meet our approximation criteria by looking at groups of atoms at a time while also providing a means for formulating the multipole expansion moments. The algorithm used for the clustering implements a principle component analysis (PCA) in the following manor.

1. First, find the Covariance matrix  $\sigma_{ij}$  of the entire  $N$  atom molecule, defined as

$$\sigma_{ij} = \sum_n^N (x_{ni} - \mu_i)(x_{nj} - \mu_j) \quad (\text{S1})$$

where  $x_{ni}$  is the  $i$ th position vector component of the  $n$ th atom in the molecule and  $\mu_j$  is the mean vector component of all  $N$  atoms.

2. Compute the eigenvalues and eigenvectors of  $\sigma_{ij}$ . Since this is only a  $3 \times 3$  matrix, CoSIMS uses an exact solution for the digitalization.
3. The eigenvector corresponding to the largest eigenvalue will be the principle component vector that we use to split the cluster of atoms. This vector will define a plane such that any atoms lying above this plane go into one cluster and those below the plane go into another.
4. Compute the center of each new cluster by taking the arithmetic mean of all atoms. The size of each cluster is then defined by the maximum vector magnitude of all atoms from this center.

5. Go to step 2 and repeat for each cluster whose size is smaller than some desired tolerance, which we will call  $R_c$ .
6. Compute the total charge, dipole, and quadrupole of each cluster.

### S3 Multipole Expansion

As mentioned in section 3.3 of the main article, the multipole expansion is performed by partitioning the electrostatic potential into an exact term  $V^{(e)}$  and an approximate term  $V^{(m)}$  such that  $V = V^{(e)} + V^{(m)}$ . The exact potential uses all atoms that belong to clusters that are either within or intersect the multipole cut-off sphere region  $\mathcal{R}$  and is computed using

$$V^{(e)} = \sum_{i \in \mathcal{R}} \frac{q_i}{|\mathbf{R} - \mathbf{r}_i|}. \quad (\text{S2})$$

Here, the summation runs over all atoms in  $\mathcal{R}$ . The approximate multipole term thus sums over all potentials computed from all other clusters of atoms. For an  $n$ th order approximation, the multipole potential  $V^{(n)}$  will have the form

$$V^{(n)} = \frac{1}{n!d^{2n+1}} d_{\alpha_1} d_{\alpha_2} \cdots d_{\alpha_n} Q_{\alpha_1 \alpha_2 \cdots \alpha_n}^{(n)} \quad (\text{S3})$$

where  $\mathbf{d}_i = \mathbf{R} - \mathbf{a}_i$  is the distance from buffer gas particles position  $\mathbf{R}$  to the vector in which the  $n$ th multipole moment  $Q^{(n)}$  is expanded about. Throughout this article, we will invoke an implicit summation over repeated indices of tensors. The multipole representation of the electrostatic potential is thus

$$V = V^{(e)} + \sum_n V^{(n)} \quad (\text{S4})$$

The electric field  $E_\nu$  evaluated at  $\mathbf{R}$  is given by the negative gradient of the potential  $-\partial_\nu V$  and is also partitioned into an exact and approximated field  $E_\nu = E_\nu^{(e)} + E_\nu^{(m)}$ . For small localized charges assigned to each atom, the induced dipole in the buffer gas atom  $p_\nu$  is proportional to the electric field so that the potential energy  $U$  is

$$U = -\frac{1}{2} p_\nu E_\nu = -\frac{\alpha}{2} E_\nu E_\nu = -\frac{1}{2} \alpha \left( E_\nu^{(m)} + E_\nu^{(e)} \right) \left( E_\nu^{(m)} + E_\nu^{(e)} \right) \quad (\text{S5})$$

with polarization constant  $\alpha$ . Further taking gradients of the above energy term gives the force  $f_\mu$  exerted on the buffer gas

$$f_\mu = -\partial_\mu U = \alpha \left( F_{\mu\nu}^{(m)} + F_{\mu\nu}^{(e)} \right) \left( E_\nu^{(m)} + E_\nu^{(e)} \right), \quad (\text{S6})$$

where  $F_{\mu\nu} = \partial_\mu E_\nu$  is denoted as the vector derivative of the electric field. From differentiating equation S3, we can write following general forms for the  $n$ th multipole field and vector derivatives used in CoSIMS:

$$E_\nu^{(n)} = \frac{1}{n!b^{2n+3}} \left( (2n+1)b_\nu Q_{\alpha_1 \alpha_2 \cdots \alpha_n} \prod_{i=1}^n b_{\alpha_i} - nb^2 Q_{\alpha_1 \alpha_2 \cdots \alpha_{n-1} \nu} \prod_{i=1}^{n-1} b_{\alpha_i} \right) \quad (\text{S7})$$

$$\begin{aligned} F_{\mu\nu}^{(n)} = \frac{2n+1}{n!b^{2n+5}} & \left[ (b^2 \delta_{\mu\nu} - (2n+3)b_\mu b_\nu) Q_{\alpha_1 \cdots \alpha_n} \prod_{i=1}^n b_{\alpha_i} \right. \\ & + nb^2 (Q_{\alpha_1 \cdots \alpha_{n-1} \nu} b_\mu + Q_{\alpha_1 \cdots \alpha_{n-1} \mu} b_\nu) \prod_{i=1}^{n-1} b_{\alpha_i} \\ & \left. - \frac{nb^4(n-1)}{2n+1} Q_{\alpha_1 \cdots \alpha_{n-2} \mu \nu} \prod_{i=1}^{n-2} b_{\alpha_i} \right] \quad (\text{S8}) \end{aligned}$$

CoSIMS uses up to the quadrupole potential, that is  $n = 3$ , although the framework presented here has the potential to incorporate higher order approximations in future versions of the software.

To test the accuracy of the multiple expansion, we applied a uniformly distributed  $+20e$  charge to a handful of the DNA strands referenced in the main article. For the short strands, we recognize that this is an unrealistic charge distribution, however, the purpose is to use a charge that is large enough where ion induced dipole interactions become significant relative to the strength of the Lennard-Jones interactions. The results of this test are presented in Figure S1, where the relative percent difference  $\sigma_p$  is defined as  $\sigma_p = 100 \times |A - B|/A$  where  $A$  is the CCS of the molecule using the exact potential and  $B$  is the CCS using the multipole approximation. Although neither the dipole or quadrupole approximation is consistently better than the other, all of the tests give a percent difference less than 0.02% which is well below the numerical accuracy of the tests.

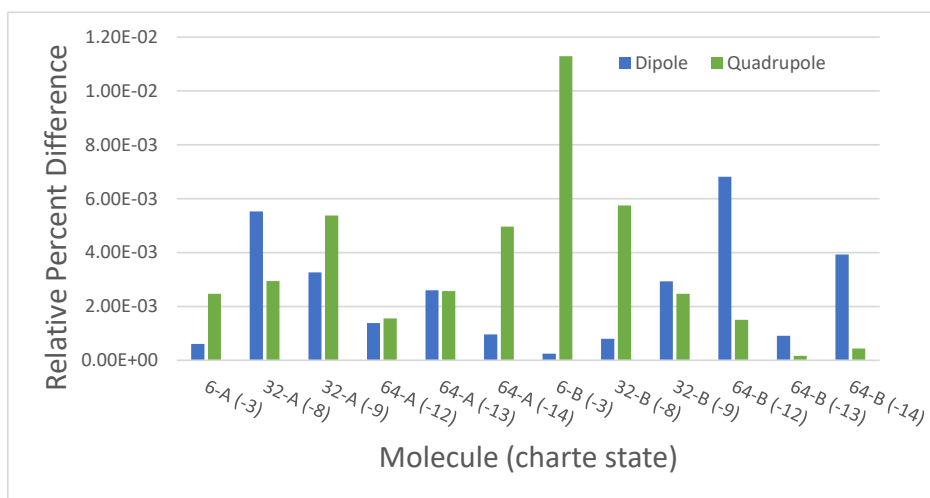

Figure S1: Relative percent difference between exactly calculated strands with a  $+20e$  charge and the dipole or quadrupole approximation. A total of  $2.5 \times 10^5$  trajectories were used at a simulation temperature of 298 Degrees Kelvin. A cut-off radius of  $35\text{\AA}$  and a cluster size of  $4\text{\AA}$  were used.

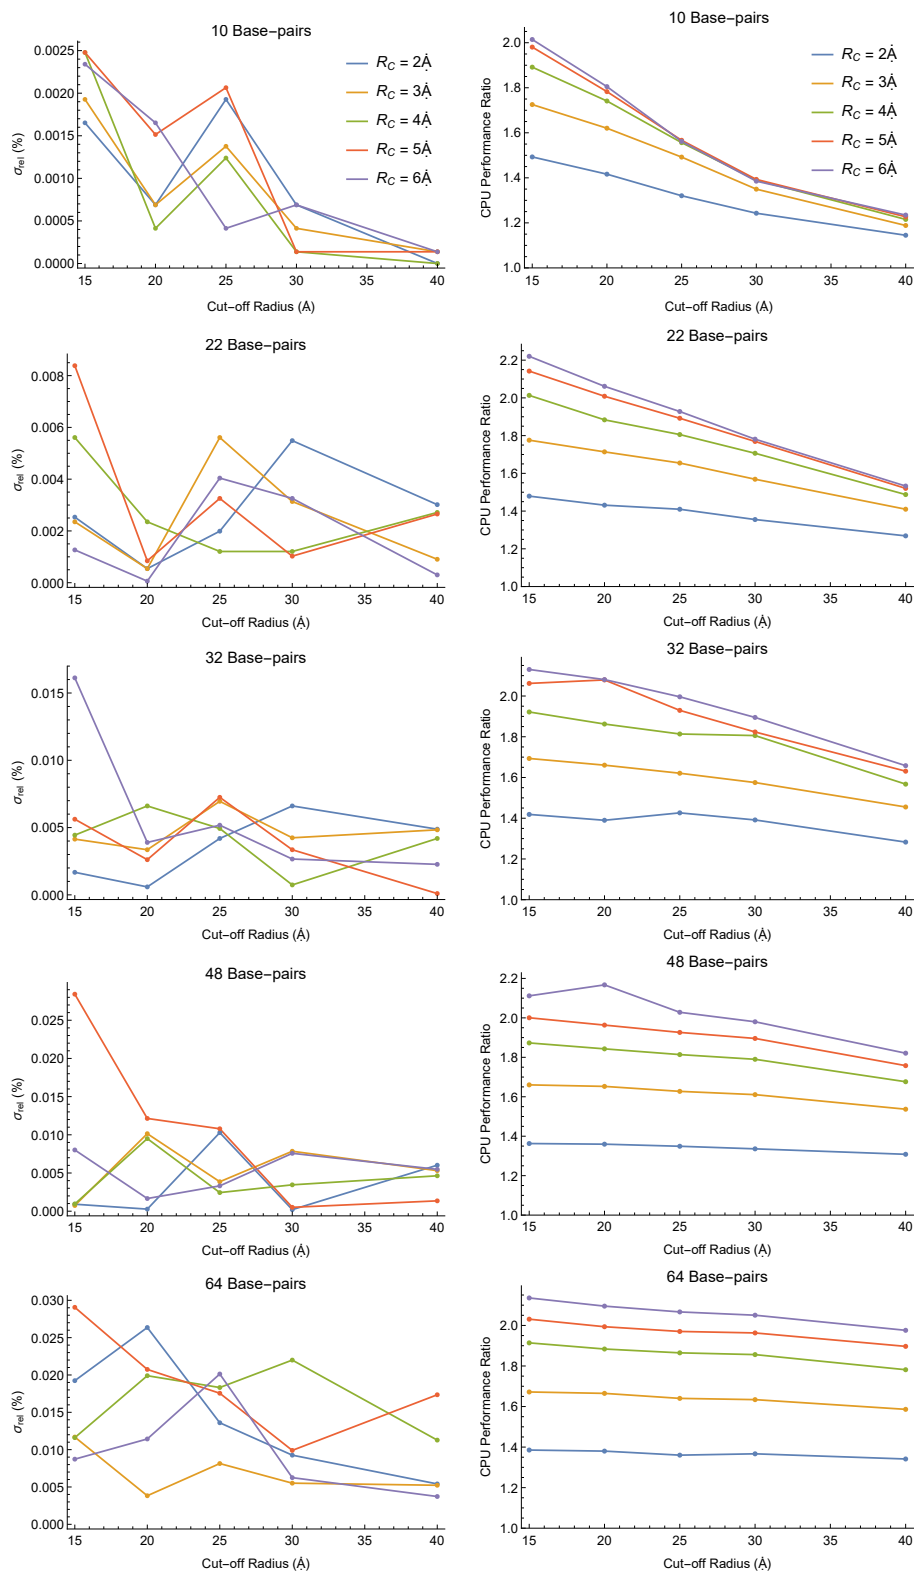

Figure S2: CCS dependence on cut-off radius and cluster size for the multipole approximation (dipole). All DNA strands used here were the same A-form strands referred to in the main text.

A further analysis of the change in accuracy and CPU performance was conducted and show in Figure S2. A single strand from the ensemble of strands referenced to in the main text were used in each of the tests. The relative percent error is the same definition used in the main article, and the CPU performance ratio is the ratio of the total CPU time used used to calculate the CCS using an exact potential to the total CPU time used to calculate the CCS with the dipole approximation.

## S4 Dispersion Cut-off Approximation

For atoms distant from the buffer gas particle, the Lennard-Jones interactions will have a negligible effect on the particles force. To approximate the distance at which this occurs, consider a single particle centered at the origin that is surrounded by a uniformly dense solid that interacts with the particle through a Lennard-Jones interaction. We will assume that the particle is centered within a hollow, spherical cavity of radius  $\sigma$ . The total potential energy  $U$  of this particle will be

$$U = \int d^3\mathbf{r} 4\rho \left[ \left(\frac{\sigma}{r}\right)^{12} - \left(\frac{\sigma}{r}\right)^6 \right] = 4\pi \int_{\sigma}^{\infty} dr r^2 4\rho \left[ \left(\frac{\sigma}{r}\right)^{12} - \left(\frac{\sigma}{r}\right)^6 \right] = -\frac{32}{9}\pi\rho\sigma^3 \quad (\text{S9})$$

with energy per unit volume  $\rho$ . By assigning a cut-off radius, we require that ratio of the total energy of this fictitious particle using the cutoff sphere to the total energy computed above is some number  $\alpha$  with  $0 < \alpha < 1$ . The total energy  $\tilde{U}$  within this cut-off sphere of radius  $a$  is

$$\begin{aligned} \tilde{U} &= 4\pi \int_{\sigma}^a dr r^2 4\rho \left[ \left(\frac{\sigma}{r}\right)^{12} - \left(\frac{\sigma}{r}\right)^6 \right] \\ &= \frac{16}{9}\pi\rho\sigma^3 \left[ 3\frac{\sigma^3}{a^3} - 2 - \frac{\sigma^9}{a^9} \right] \end{aligned} \quad (\text{S10})$$

If the cut-off radius  $a$  is sufficiently much larger than  $\sigma$ , then their ratio will be small and the  $(\sigma^9/a^9)$  term can be dropped. Applying this approximation and taking the ratio of  $\tilde{U}/U$  gives us

$$\tilde{U}/U = 1 - \frac{3}{2} \left(\frac{\sigma}{a}\right)^3 = \alpha \quad \rightarrow \quad a = \sigma \left(\frac{3}{2 - 2\alpha}\right)^{1/3} \quad (\text{S11})$$

CoSIMS chooses the largest possible  $\sigma$  parameter available in the forcefield, which is  $3.5\text{\AA}$ , and a ratio  $\alpha = 0.995$ . For these conditions,  $a \approx 23.43\text{\AA}$ .

Similar to the dipole accuracy tests presented in Figure S2, we performed the same tests for dispersion cut-off approximation on the same strands and with the same simulation parameters, except that no charge was applied to the molecule. The results are shown in Figure S3.

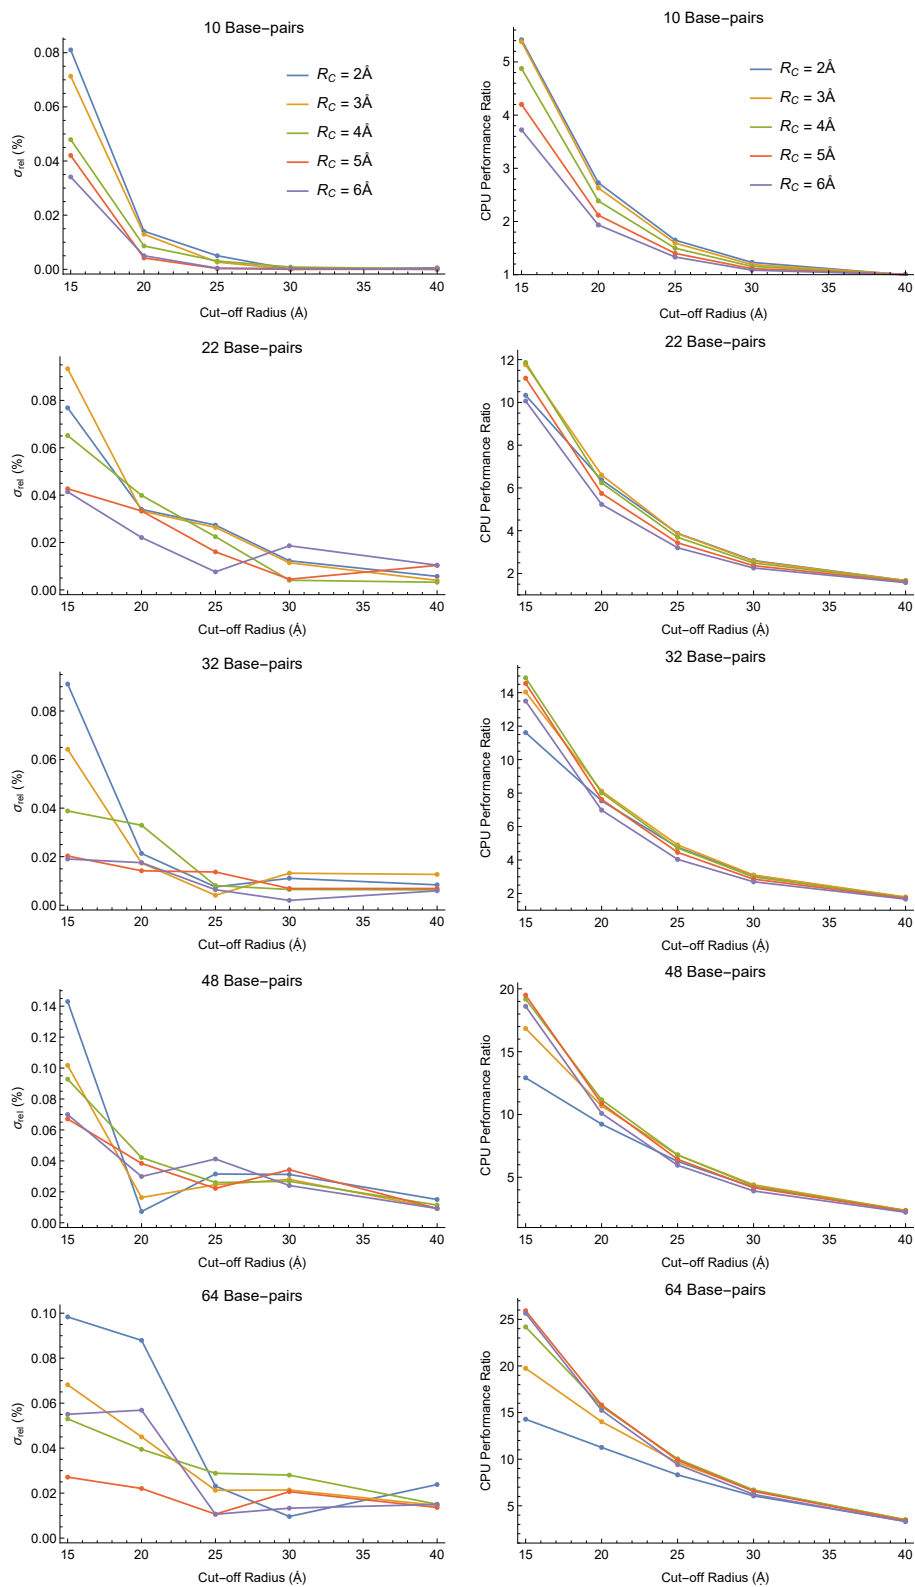

Figure S3: CCS dependence on cut-off radius and cluster size for the dispersion cut-off approximation. All DNA strands used here were the same A-form strands referred to in the main text.

## S5 CPU Benchmarks

In Figure 7 of the main article, we showed the CPU performance for neutral DNA strands for MOBCAL vs. CoSIMS using the exactly calculated potential and the dispersion cut-off approximation for the B-form DNA strands. Shown in Figure S4 are the remaining figures for the A-form DNA strands and for using a uniformly distributed charge.

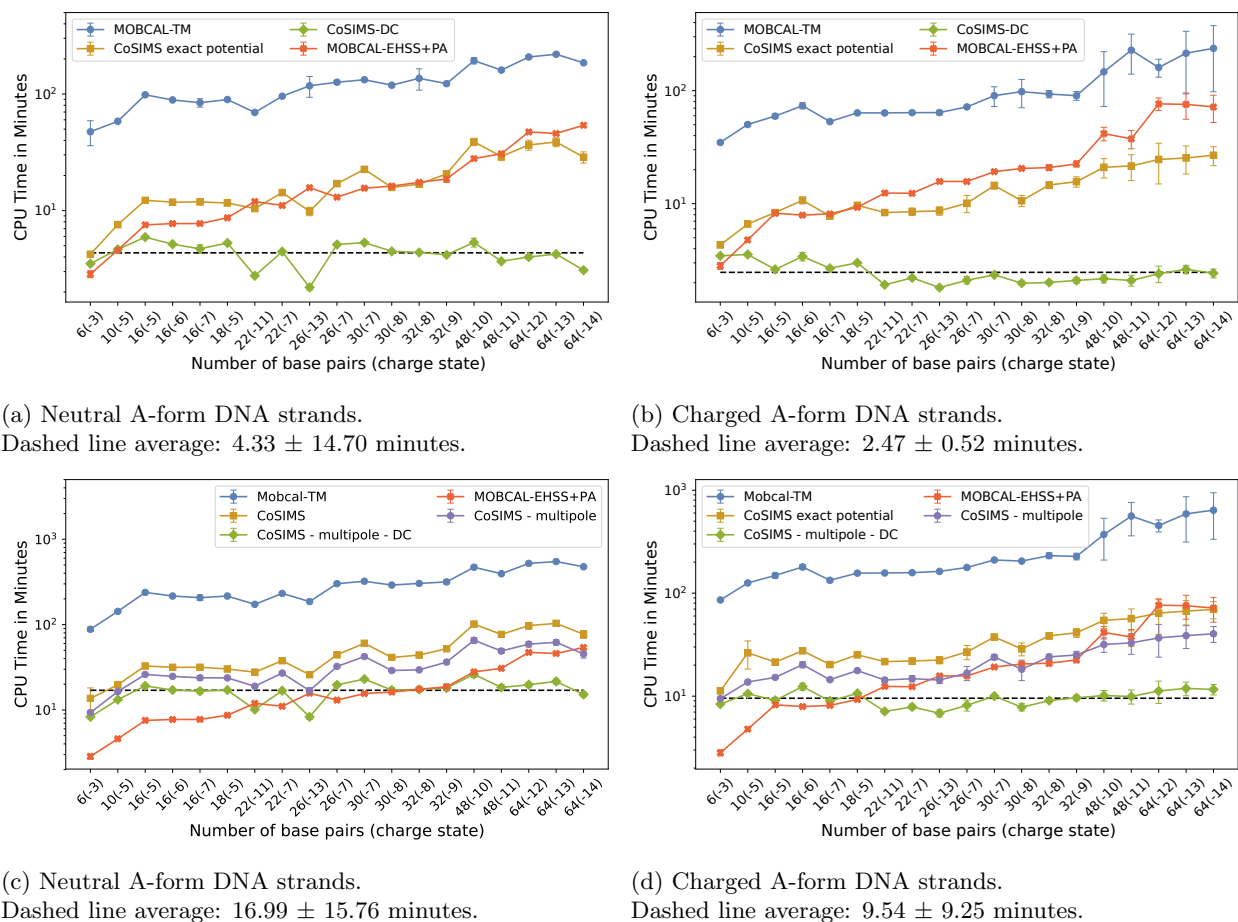

Figure S4: CPU runtimes for neutral and charged DNA strands. The dashed line represents an average CPU time using the DC approximation.

CoSIMS also utilizes the OpenMP multi-threading library to distribute the calculation of the programs many trajectories over multiple processors. Figure S5 demonstrates the efficiency of the OpenMP implementation in CoSIMS for the 64 base pair B-form DNA strands. The Ratio of the total CPU time used to calculate the CCS using 1 CPU thread  $t_0$  to the total time to calculate with multiple threads  $t$  is shown on the left axis while the total time is shown on the right axis. This test was performed using the same hardware configuration describe in the main text.

## S6 Stability and RMSD Tests for Long DNA Strands

As mentioned in the main article, MOBCAL gives inaccurate CCSs for the large B-form strands of DNA in our data set. An example of such occurrences and how the RMSD difference between two consecutive MD simulation frames does not explain this error was presented for the 64 base pair, B-form, -14 charge state

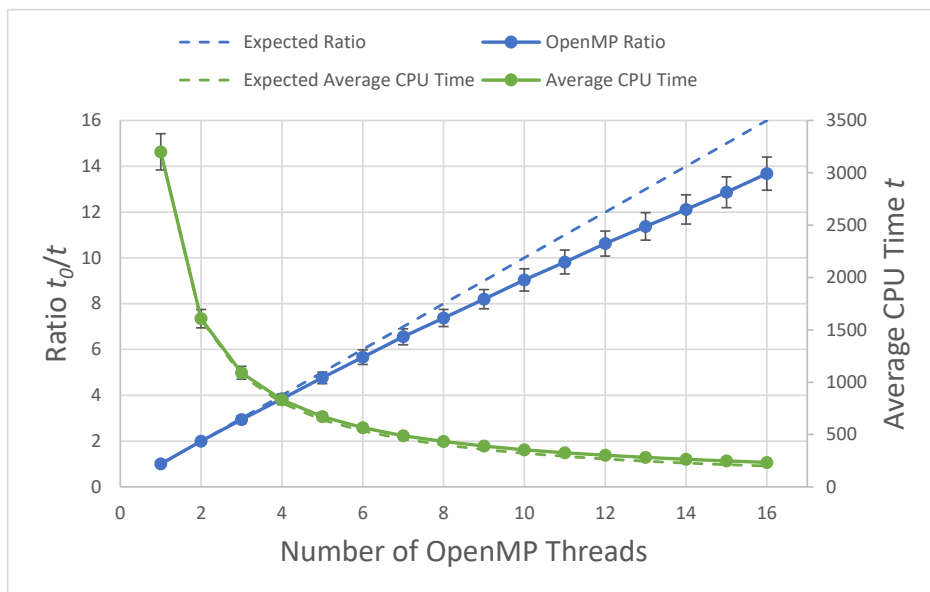

Figure S5: CPU Scaling for OpenMP threads for the 64-B(-12) DNA strand. Data points represented as a average CPU wall time for all 21 MD snapshots and Error bars represent the standard deviation of the respected averages.

set of structures. For remaining 64 base pair, B-form strands, including the one used in the main article, are shown in Figure S6.



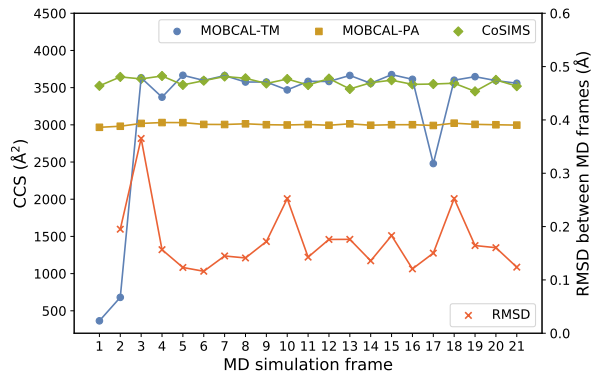

(a) Neutral, B-form, 48 base pair, -10 charge state

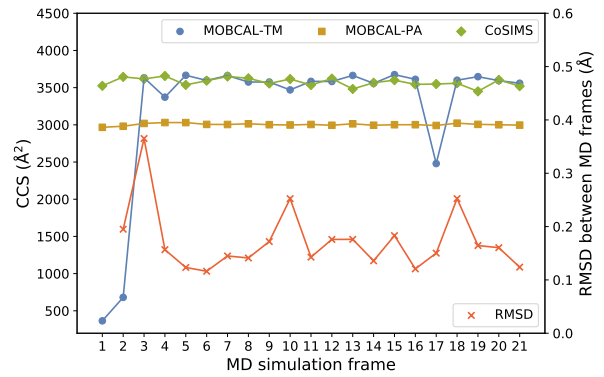

(b) Neutral, B-form, 48 base pair, -11 charge state

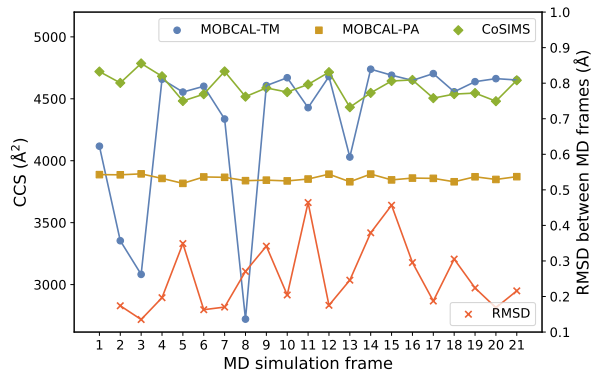

(c) Neutral, B-form, 64 base pair, -12 charge state

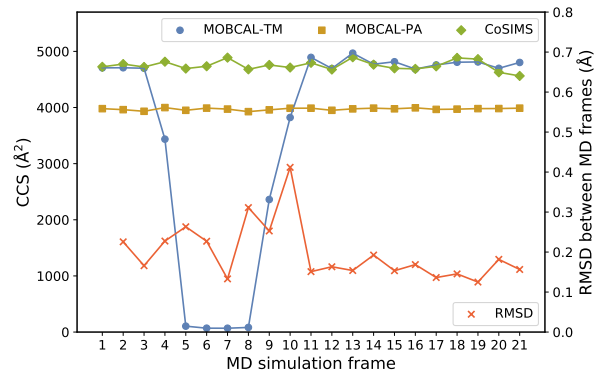

(d) Neutral, B-form, 64 base pair, -13 charge state

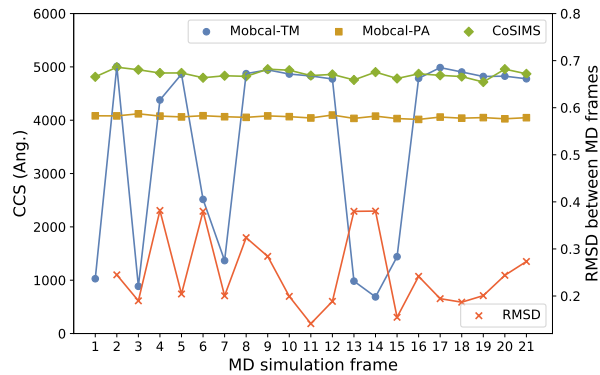

(e) Neutral, B-form, 64 base pair, -14 charge state

Figure S6: Stability of CoSIMS vs. MOB-CAL and their relation to the RMSD difference between MD simulation frames.

## S7 Tabulated Data

In this section, the data for the various plots used in the main article are presented. A description of the data and what figure it is used in is given in the caption of each table.

| Molecule   | CoSIMS<br>(min) | CoSIMS - DC<br>(min) | MOBCAL<br>(min) | MOBCAL/<br>CoSIMS | MOBCAL/<br>CoSIMS-DC |
|------------|-----------------|----------------------|-----------------|-------------------|----------------------|
| 6-A (-3)   | 4.22 ± 2.0%     | 3.50 ± 2.11%         | 50.4 ± 23.0%    | 11.92             | 14.37                |
| 10-A (-5)  | 7.58 ± 1.5%     | 4.64 ± 2.10%         | 62.9 ± 1.4%     | 8.30              | 13.56                |
| 16-A (-5)  | 12.24 ± 1.6%    | 5.91 ± 1.33%         | 106.1 ± 1.2%    | 8.66              | 17.94                |
| 16-A (-6)  | 11.81 ± 1.8%    | 5.15 ± 1.58%         | 96.7 ± 1.5%     | 8.19              | 18.78                |
| 16-A (-7)  | 11.86 ± 5.3%    | 4.70 ± 8.33%         | 91.9 ± 7.4%     | 7.75              | 19.55                |
| 18-A (-5)  | 11.63 ± 1.7%    | 5.27 ± 1.63%         | 98.3 ± 1.4%     | 8.45              | 18.64                |
| 22-A (-11) | 10.42 ± 3.0%    | 2.76 ± 1.76%         | 81.5 ± 0.6%     | 7.82              | 29.51                |
| 22-A (-7)  | 14.27 ± 2.5%    | 4.45 ± 1.38%         | 106.8 ± 2.4%    | 7.49              | 24.03                |
| 26-A (-13) | 9.85 ± 8.3%     | 2.20 ± 5.41%         | 133.3 ± 18.0%   | 13.53             | 60.72                |
| 26-A (-7)  | 17.04 ± 2.8%    | 5.12 ± 2.27%         | 139.4 ± 3.0%    | 8.18              | 27.23                |
| 30-A (-7)  | 22.61 ± 3.1%    | 5.31 ± 2.71%         | 148.2 ± 1.8%    | 6.56              | 27.89                |
| 30-A (-8)  | 15.79 ± 4.8%    | 4.47 ± 2.03%         | 135.2 ± 0.9%    | 8.56              | 30.26                |
| 32-A (-8)  | 16.87 ± 2.5%    | 4.38 ± 1.49%         | 153.8 ± 18.4%   | 9.12              | 35.14                |
| 32-A (-9)  | 20.66 ± 5.4%    | 4.17 ± 4.15%         | 141.4 ± 1.9%    | 6.84              | 33.90                |
| 48-A (-10) | 38.91 ± 7.2%    | 5.33 ± 8.73%         | 221.3 ± 5.3%    | 5.69              | 41.51                |
| 48-A (-11) | 29.11 ± 7.9%    | 3.67 ± 1.96%         | 191.2 ± 1.0%    | 6.57              | 52.04                |
| 64-A (-12) | 36.53 ± 9.9%    | 4.00 ± 4.73%         | 255.1 ± 2.0%    | 6.98              | 63.72                |
| 64-A (-13) | 38.72 ± 8.7%    | 4.23 ± 3.27%         | 265.2 ± 1.7%    | 6.85              | 62.68                |
| 64-A (-14) | 28.74 ± 11.0%   | 3.08 ± 3.53%         | 239.2 ± 1.2%    | 8.32              | 77.65                |
| 6-B (-3)   | 4.31 ± 1.80%    | 3.46 ± 1.64%         | 37.6 ± 2.0%     | 8.73              | 10.88                |
| 10-B (-5)  | 6.62 ± 2.06%    | 3.55 ± 2.34%         | 55.0 ± 2.5%     | 8.31              | 15.50                |
| 16-B (-5)  | 8.35 ± 3.55%    | 2.62 ± 2.86%         | 67.7 ± 3.9%     | 8.11              | 25.82                |
| 16-B (-6)  | 10.71 ± 7.03%   | 3.41 ± 8.42%         | 81.5 ± 5.6%     | 7.61              | 23.88                |
| 16-B (-7)  | 7.78 ± 2.43%    | 2.68 ± 1.96%         | 61.4 ± 1.9%     | 7.89              | 22.86                |
| 18-B (-5)  | 9.68 ± 1.84%    | 3.00 ± 2.24%         | 72.8 ± 1.9%     | 7.52              | 24.27                |
| 22-B (-11) | 8.36 ± 4.84%    | 1.92 ± 2.95%         | 75.9 ± 2.2%     | 9.09              | 39.59                |
| 22-B (-7)  | 8.51 ± 7.74%    | 2.21 ± 3.55%         | 76.2 ± 1.7%     | 8.96              | 34.49                |
| 26-B (-13) | 8.65 ± 8.55%    | 1.81 ± 2.55%         | 79.7 ± 3.6%     | 9.22              | 44.00                |
| 26-B (-7)  | 10.09 ± 17.30%  | 2.11 ± 7.54%         | 87.5 ± 2.0%     | 8.67              | 41.53                |
| 30-B (-7)  | 14.46 ± 7.04%   | 2.35 ± 2.73%         | 109.5 ± 16.3%   | 7.57              | 46.62                |
| 30-B (-8)  | 10.62 ± 11.14%  | 1.98 ± 4.17%         | 118.5 ± 23.2%   | 11.16             | 59.72                |
| 32-B (-8)  | 14.62 ± 6.89%   | 2.01 ± 3.79%         | 114.1 ± 5.1%    | 7.80              | 56.77                |
| 32-B (-9)  | 15.66 ± 10.50%  | 2.10 ± 5.63%         | 112.7 ± 6.5%    | 7.20              | 53.76                |
| 48-B (-10) | 20.98 ± 19.56%  | 2.17 ± 8.23%         | 188.4 ± 37.1%   | 8.98              | 86.86                |
| 48-B (-11) | 21.55 ± 25.61%  | 2.09 ± 11.10%        | 265.4 ± 31.8%   | 12.32             | 126.7                |
| 64-B (-12) | 24.61 ± 39.25%  | 2.40 ± 16.62%        | 236.8 ± 9.3%    | 9.62              | 98.60                |
| 64-B (-13) | 25.38 ± 27.88%  | 2.63 ± 8.49%         | 289.9 ± 37.1%   | 11.42             | 110.4                |
| 64-B (-14) | 26.82 ± 19.13%  | 2.43 ± 9.07%         | 308.3 ± 39.2%   | 11.49             | 127.1                |

Table S1: CPU benchmarks for the neutrally charged MD-frames. This data is used in Figures S4a and S4b and in Figure 7

| Molecule   | No. Atoms | Minimum<br>RMSD (Å) | Maximum<br>RMSD (Å) | CoSIMS (Å <sup>2</sup> ) | MOBCAL (Å <sup>2</sup> ) | MOBCAL/<br>CoSIMS |
|------------|-----------|---------------------|---------------------|--------------------------|--------------------------|-------------------|
| 6-A (-3)   | 383       | 0.509               | 1.125               | 483.0 ± 1.07%            | 489.5 ± 0.99%            | 1.01              |
| 10-A (-5)  | 641       | 0.522               | 0.787               | 720.9 ± 0.83%            | 731.9 ± 1.12%            | 1.02              |
| 16-A (-5)  | 1039      | 0.799               | 1.330               | 992.0 ± 0.88%            | 1006.7 ± 0.89%           | 1.01              |
| 16-A (-6)  | 1038      | 0.809               | 1.630               | 1068.1 ± 1.45%           | 1078.7 ± 1.36%           | 1.01              |
| 16-A (-7)  | 1037      | 1.092               | 3.718               | 1165.5 ± 2.25%           | 1183.2 ± 2.07%           | 1.02              |
| 18-A (-5)  | 1161      | 0.558               | 1.212               | 1120.6 ± 0.97%           | 1134.4 ± 1.02%           | 1.01              |
| 22-A (-11) | 1415      | 0.656               | 1.065               | 1644.5 ± 0.83%           | 1672.2 ± 0.85%           | 1.02              |
| 22-A (-7)  | 1419      | 0.607               | 1.035               | 1383.1 ± 0.99%           | 1402.1 ± 0.78%           | 1.01              |
| 26-A (-13) | 1673      | 2.626               | 4.528               | 2149.5 ± 1.25%           | 2181.0 ± 1.43%           | 1.01              |
| 26-A (-7)  | 1679      | 0.702               | 2.450               | 1597.3 ± 1.07%           | 1618.1 ± 0.94%           | 1.01              |
| 30-A (-7)  | 1958      | 0.768               | 1.886               | 1697.1 ± 1.06%           | 1712.3 ± 1.09%           | 1.01              |
| 30-A (-8)  | 1957      | 1.046               | 1.669               | 1786.9 ± 0.93%           | 1804.9 ± 0.91%           | 1.01              |
| 32-A (-8)  | 2087      | 1.044               | 1.337               | 1928.5 ± 0.96%           | 1954.3 ± 0.64%           | 1.01              |
| 32-A (-9)  | 2086      | 1.103               | 3.212               | 1982.7 ± 1.07%           | 2019.6 ± 1.08%           | 1.02              |
| 48-A (-10) | 3134      | 1.274               | 5.749               | 2693.3 ± 1.19%           | 2728.0 ± 1.41%           | 1.01              |
| 48-A (-11) | 3133      | 0.937               | 2.322               | 2922.4 ± 0.97%           | 2962.4 ± 1.27%           | 1.01              |
| 64-A (-12) | 4182      | 1.097               | 2.774               | 3617.2 ± 1.20%           | 3668.4 ± 1.06%           | 1.01              |
| 64-A (-13) | 4181      | 1.198               | 2.981               | 3548.2 ± 1.19%           | 3598.6 ± 0.87%           | 1.01              |
| 64-A (-14) | 4180      | 1.219               | 2.530               | 3852.2 ± 0.83%           | 3905.6 ± 0.95%           | 1.01              |
| 6-B (-3)   | 383       | 0.655               | 1.098               | 496.3 ± 1.62%            | 502.3 ± 1.61%            | 1.01              |
| 10-B (-5)  | 641       | 0.825               | 1.447               | 820.4 ± 1.44%            | 831.2 ± 1.16%            | 1.01              |
| 16-B (-5)  | 1039      | 0.898               | 2.040               | 1258.8 ± 1.68%           | 1280.0 ± 1.32%           | 1.02              |
| 16-B (-6)  | 1038      | 1.339               | 4.159               | 1245.3 ± 1.79%           | 1259.5 ± 1.89%           | 1.01              |
| 16-B (-7)  | 1037      | 0.762               | 1.481               | 1248.0 ± 1.02%           | 1267.2 ± 1.09%           | 1.02              |
| 18-B (-5)  | 1161      | 0.849               | 1.464               | 1368.1 ± 0.85%           | 1388.2 ± 1.04%           | 1.01              |
| 22-B (-11) | 1415      | 1.391               | 2.573               | 1720.7 ± 1.39%           | 1728.4 ± 0.78%           | 1.00              |
| 22-B (-7)  | 1419      | 0.711               | 1.704               | 1685.6 ± 1.23%           | 1713.7 ± 0.97%           | 1.02              |
| 26-B (-13) | 1673      | 0.721               | 1.495               | 1987.0 ± 0.97%           | 2008.1 ± 1.24%           | 1.01              |
| 26-B (-7)  | 1679      | 1.556               | 5.807               | 2011.6 ± 1.36%           | 2032.5 ± 0.99%           | 1.01              |
| 30-B (-7)  | 1958      | 1.319               | 2.123               | 2264.5 ± 1.44%           | 2300.8 ± 0.94%           | 1.02              |
| 30-B (-8)  | 1957      | 1.127               | 2.665               | 2379.4 ± 1.57%           | 2393.1 ± 1.07%           | 1.01              |
| 32-B (-8)  | 2087      | 0.891               | 3.021               | 2409.8 ± 1.35%           | 2422.8 ± 2.99%           | 1.01              |
| 32-B (-9)  | 2086      | 1.325               | 2.464               | 2399.6 ± 1.20%           | 2406.8 ± 3.70%           | 1.00              |
| 48-B (-10) | 3134      | 1.951               | 6.268               | 3574.0 ± 1.52%           | 3245.5 ± 28.29%          | 0.91              |
| 48-B (-11) | 3133      | 1.880               | 5.107               | 3623.6 ± 1.69%           | 2115.2 ± 58.32%          | 0.58              |
| 64-B (-12) | 4182      | 1.667               | 6.182               | 4597.1 ± 2.01%           | 4339.5 ± 13.00%          | 0.94              |
| 64-B (-13) | 4181      | 1.948               | 4.278               | 4747.3 ± 1.79%           | 3655.4 ± 50.10%          | 0.77              |
| 64-B (-14) | 4180      | 2.450               | 4.930               | 4861.2 ± 1.44%           | 3645.0 ± 47.00%          | 0.75              |

Table S2: CCS calculations for the neutrally charged MD-frames used in Figures 5a and 5b. Minimum and maximum RMSD values are calculated over all frames in the ensemble with respect to the first frame.

| Protein | CoSIMS ( $\text{\AA}^2$ ) | MOBCAL ( $\text{\AA}^2$ ) |
|---------|---------------------------|---------------------------|---------------------------|---------------------------|---------------------------|
|         | Exact                     | $R_d = 30 \text{ \AA}$    | $R_d = 30 \text{ \AA}$    | $R_d = 25 \text{ \AA}$    | Exact                     |
|         | Potential                 | $R_c = 3 \text{ \AA}$     | $R_c = 6 \text{ \AA}$     | $R_c = 6 \text{ \AA}$     | Potential                 |
| 2m1k    | 2669.1 $\pm$ 0.21%        | 2671.0 $\pm$ 0.23%        | 2671.8 $\pm$ 0.21%        | 2671.7 $\pm$ 0.22%        | 2708.9 $\pm$ 0.71%        |
| 2mwg    | 5394.8 $\pm$ 0.41%        | 5387.9 $\pm$ 0.40%        | 5396.4 $\pm$ 0.41%        | 5390.5 $\pm$ 0.40%        | 5443.0 $\pm$ 0.35%        |
| 2mz6    | 846.8 $\pm$ 0.52%         | 846.8 $\pm$ 0.52%         | 846.8 $\pm$ 0.51%         | 846.8 $\pm$ 0.52%         | 863.8 $\pm$ 0.55%         |
| 4p3v    | 1137.9 $\pm$ 0.24%        | 1137.9 $\pm$ 0.23%        | 1138.2 $\pm$ 0.24%        | 1137.5 $\pm$ 0.24%        | 1156.9 $\pm$ 0.38%        |
| 4r06    | 4313.9 $\pm$ 0.41%        | 4314.0 $\pm$ 0.39%        | 4313.5 $\pm$ 0.40%        | 4315.0 $\pm$ 0.40%        | 4339.8 $\pm$ 0.65%        |
| 4r8z    | 3739.6 $\pm$ 0.20%        | 3741.7 $\pm$ 0.20%        | 3742.4 $\pm$ 0.20%        | 3742.9 $\pm$ 0.20%        | 3805.4 $\pm$ 0.41%        |
| 4rna    | 3251.5 $\pm$ 0.30%        | 3250.6 $\pm$ 0.30%        | 3250.6 $\pm$ 0.29%        | 3251.3 $\pm$ 0.30%        | 3315.6 $\pm$ 0.55%        |
| 4xmqq   | 4570.1 $\pm$ 0.21%        | 4570.1 $\pm$ 0.23%        | 4569.1 $\pm$ 0.22%        | 4567.6 $\pm$ 0.25%        | 4633.9 $\pm$ 0.29%        |
| 4zn8    | 2314.8 $\pm$ 0.18%        | 2312.9 $\pm$ 0.18%        | 2313.9 $\pm$ 0.18%        | 2313.5 $\pm$ 0.19%        | 2343.0 $\pm$ 0.44%        |
| 5arm    | 1563.4 $\pm$ 0.56%        | 1563.8 $\pm$ 0.55%        | 1564.0 $\pm$ 0.55%        | 1563.8 $\pm$ 0.55%        | 1607.0 $\pm$ 0.46%        |
| 5b6o    | 4835.0 $\pm$ 0.24%        | 4833.6 $\pm$ 0.24%        | 4833.9 $\pm$ 0.24%        | 4830.5 $\pm$ 0.26%        | 4864.3 $\pm$ 0.42%        |
| 5fnn    | 2202.6 $\pm$ 0.49%        | 2201.9 $\pm$ 0.50%        | 2201.9 $\pm$ 0.49%        | 2200.6 $\pm$ 0.50%        | 2229.4 $\pm$ 0.52%        |
| 5h6w    | 4130.1 $\pm$ 0.06%        | 4130.0 $\pm$ 0.06%        | 4128.2 $\pm$ 0.06%        | 4128.7 $\pm$ 0.05%        | 4186.5 $\pm$ 0.44%        |
| 5ieu    | 2390.4 $\pm$ 0.26%        | 2391.2 $\pm$ 0.26%        | 2391.5 $\pm$ 0.25%        | 2390.3 $\pm$ 0.25%        | 2418.5 $\pm$ 0.53%        |
| 5iew    | 1178.9 $\pm$ 0.53%        | 1178.8 $\pm$ 0.53%        | 1178.7 $\pm$ 0.53%        | 1178.8 $\pm$ 0.53%        | 1195.8 $\pm$ 0.35%        |
| 5iir    | 1184.4 $\pm$ 0.65%        | 1184.3 $\pm$ 0.65%        | 1184.4 $\pm$ 0.65%        | 1184.2 $\pm$ 0.64%        | 1187.5 $\pm$ 0.41%        |
| 5ilg    | 3994.0 $\pm$ 0.27%        | 3991.7 $\pm$ 0.27%        | 3992.5 $\pm$ 0.26%        | 3993.1 $\pm$ 0.26%        | 4046.7 $\pm$ 0.28%        |
| 5jip    | 5125.2 $\pm$ 0.33%        | 5120.4 $\pm$ 0.33%        | 5118.5 $\pm$ 0.32%        | 5122.4 $\pm$ 0.34%        | 5156.7 $\pm$ 0.34%        |
| 5lvz    | 2536.3 $\pm$ 0.35%        | 2535.8 $\pm$ 0.35%        | 2535.6 $\pm$ 0.35%        | 2537.2 $\pm$ 0.34%        | 2571.3 $\pm$ 0.55%        |
| 5lx4    | 3427.3 $\pm$ 0.47%        | 3426.7 $\pm$ 0.45%        | 3424.8 $\pm$ 0.45%        | 3425.7 $\pm$ 0.45%        | 3446.8 $\pm$ 0.60%        |
| 5mus    | 5229.3 $\pm$ 0.37%        | 5229.1 $\pm$ 0.40%        | 5231.4 $\pm$ 0.39%        | 5230.9 $\pm$ 0.40%        | 5317.7 $\pm$ 0.30%        |
| 5my9    | 2629.8 $\pm$ 0.39%        | 2629.3 $\pm$ 0.39%        | 2629.2 $\pm$ 0.39%        | 2630.0 $\pm$ 0.38%        | 2688.0 $\pm$ 0.27%        |
| 5t95    | 4218.1 $\pm$ 0.60%        | 4217.6 $\pm$ 0.60%        | 4215.1 $\pm$ 0.60%        | 4216.2 $\pm$ 0.60%        | 4227.0 $\pm$ 0.35%        |
| 5ujl    | 1981.0 $\pm$ 0.28%        | 1980.5 $\pm$ 0.27%        | 1980.5 $\pm$ 0.26%        | 1980.8 $\pm$ 0.25%        | 2018.2 $\pm$ 0.60%        |
| 5x29    | 3416.0 $\pm$ 0.19%        | 3419.3 $\pm$ 0.21%        | 3410.4 $\pm$ 0.21%        | 3411.2 $\pm$ 0.19%        | 3431.6 $\pm$ 0.45%        |

Table S3: CCS calculations for symmetric proteins with and without the dispersion cutoff approximation for various radii parameters. Here,  $R_d$  is the cut-off radius and  $R_c$  is the cluster radius. The first column using the exact potential and the last column for MOBCAL contains the data used to generate Figure 3 in the main article. The relative percent difference between the CCS calculated using exact potential and the approximated potential are shown in Figure S5

| Protein | CoSIMS ( $\text{\AA}^2$ ) | CoSIMS ( $\text{\AA}^2$ )                       | CoSIMS ( $\text{\AA}^2$ )                       | CoSIMS ( $\text{\AA}^2$ )                       | MOBCAL ( $\text{\AA}^2$ ) |
|---------|---------------------------|-------------------------------------------------|-------------------------------------------------|-------------------------------------------------|---------------------------|
|         | Exact<br>Potential        | $R_d = 30 \text{ \AA}$<br>$R_c = 3 \text{ \AA}$ | $R_d = 30 \text{ \AA}$<br>$R_c = 6 \text{ \AA}$ | $R_d = 25 \text{ \AA}$<br>$R_c = 6 \text{ \AA}$ | Exact<br>Potential        |
| 2mr8    | 1348.3 $\pm$ 0.36%        | 1348.2 $\pm$ 0.36%                              | 1347.8 $\pm$ 0.35%                              | 1347.9 $\pm$ 0.36%                              | 1347.7 $\pm$ 0.44%        |
| 2n3u    | 2973.8 $\pm$ 0.29%        | 2972.6 $\pm$ 0.28%                              | 2974.6 $\pm$ 0.26%                              | 2972.9 $\pm$ 0.26%                              | 3003.0 $\pm$ 0.29%        |
| 2n44    | 3452.4 $\pm$ 0.69%        | 3452.1 $\pm$ 0.71%                              | 3453.0 $\pm$ 0.70%                              | 3453.9 $\pm$ 0.70%                              | 3496.9 $\pm$ 0.47%        |
| 2n9z    | 830.5 $\pm$ 0.26%         | 830.5 $\pm$ 0.26%                               | 830.6 $\pm$ 0.26%                               | 830.5 $\pm$ 0.25%                               | 747.5 $\pm$ 0.45%         |
| 4p2b    | 4494.9 $\pm$ 0.53%        | 4491.2 $\pm$ 0.51%                              | 4491.6 $\pm$ 0.52%                              | 4493.5 $\pm$ 0.49%                              | 4517.1 $\pm$ 0.45%        |
| 4rlo    | 4620.8 $\pm$ 0.41%        | 4622.1 $\pm$ 0.42%                              | 4624.7 $\pm$ 0.42%                              | 4625.6 $\pm$ 0.43%                              | 4682.5 $\pm$ 0.51%        |
| 4ub0    | 3716.1 $\pm$ 0.37%        | 3717.0 $\pm$ 0.35%                              | 3717.0 $\pm$ 0.35%                              | 3716.8 $\pm$ 0.35%                              | 3726.4 $\pm$ 0.55%        |
| 4w6f    | 3956.4 $\pm$ 0.38%        | 3954.7 $\pm$ 0.37%                              | 3957.9 $\pm$ 0.37%                              | 3954.5 $\pm$ 0.36%                              | 4023.6 $\pm$ 0.42%        |
| 4xol    | 2004.5 $\pm$ 0.36%        | 2004.9 $\pm$ 0.36%                              | 2005.4 $\pm$ 0.36%                              | 2004.5 $\pm$ 0.37%                              | 385.8 $\pm$ 0.91%         |
| 4y4q    | 3350.3 $\pm$ 0.31%        | 3349.4 $\pm$ 0.31%                              | 3350.8 $\pm$ 0.32%                              | 3349.7 $\pm$ 0.31%                              | 3352.6 $\pm$ 0.45%        |
| 4zpf    | 3167.7 $\pm$ 0.37%        | 3165.4 $\pm$ 0.37%                              | 3165.6 $\pm$ 0.36%                              | 3166.6 $\pm$ 0.37%                              | 3202.3 $\pm$ 0.43%        |
| 5bz0    | 2878.7 $\pm$ 0.16%        | 2877.4 $\pm$ 0.17%                              | 2878.5 $\pm$ 0.16%                              | 2877.9 $\pm$ 0.17%                              | 2897.3 $\pm$ 0.39%        |
| 5cxv    | 4346.2 $\pm$ 0.27%        | 4347.6 $\pm$ 0.28%                              | 4347.4 $\pm$ 0.27%                              | 4348.7 $\pm$ 0.28%                              | 4380.0 $\pm$ 0.40%        |
| 5e21    | 1344.3 $\pm$ 0.36%        | 1344.5 $\pm$ 0.36%                              | 1344.5 $\pm$ 0.36%                              | 1344.2 $\pm$ 0.36%                              | 1362.5 $\pm$ 0.70%        |
| 5h7b    | 5354.6 $\pm$ 0.57%        | 5351.3 $\pm$ 0.59%                              | 5351.1 $\pm$ 0.57%                              | 5350.0 $\pm$ 0.57%                              | 5376.2 $\pm$ 0.52%        |
| 5imk    | 2547.5 $\pm$ 0.23%        | 2548.1 $\pm$ 0.22%                              | 2548.6 $\pm$ 0.23%                              | 2548.7 $\pm$ 0.22%                              | 2593.0 $\pm$ 0.60%        |
| 5jqf    | 648.2 $\pm$ 0.47%         | 648.2 $\pm$ 0.47%                               | 648.2 $\pm$ 0.47%                               | 648.3 $\pm$ 0.47%                               | 662.4 $\pm$ 0.25%         |
| 5lr1    | 2170.9 $\pm$ 0.41%        | 2171.6 $\pm$ 0.41%                              | 2171.1 $\pm$ 0.42%                              | 2171.7 $\pm$ 0.41%                              | 2228.1 $\pm$ 0.52%        |
| 5lt8    | 2536.3 $\pm$ 0.26%        | 2536.3 $\pm$ 0.27%                              | 2536.3 $\pm$ 0.27%                              | 2534.4 $\pm$ 0.24%                              | 2549.8 $\pm$ 0.43%        |
| 5pdo    | 1596.1 $\pm$ 0.31%        | 1596.1 $\pm$ 0.30%                              | 1596.2 $\pm$ 0.31%                              | 1595.5 $\pm$ 0.30%                              | 1347.9 $\pm$ 0.21%        |
| 5uk5    | 5570.4 $\pm$ 0.25%        | 5565.6 $\pm$ 0.22%                              | 5565.6 $\pm$ 0.22%                              | 5569.5 $\pm$ 0.23%                              | 5619.9 $\pm$ 0.95%        |
| 5viz    | 749.0 $\pm$ 0.44%         | 749.0 $\pm$ 0.44%                               | 749.0 $\pm$ 0.44%                               | 748.9 $\pm$ 0.44%                               | 756.4 $\pm$ 0.48%         |
| 5wxg    | 1086.5 $\pm$ 0.39%        | 1086.4 $\pm$ 0.39%                              | 1086.5 $\pm$ 0.39%                              | 1086.5 $\pm$ 0.39%                              | 1109.7 $\pm$ 0.51%        |
| 5x3l    | 473.2 $\pm$ 0.36%         | 473.2 $\pm$ 0.36%                               | 473.2 $\pm$ 0.36%                               | 473.2 $\pm$ 0.36%                               | 479.1 $\pm$ 0.45%         |
| 5yfg    | 2290.6 $\pm$ 0.50%        | 2290.3 $\pm$ 0.52%                              | 2291.1 $\pm$ 0.51%                              | 2289.6 $\pm$ 0.51%                              | 2288.1 $\pm$ 0.53%        |

Table S4: CCS calculations for asymmetric proteins with and without the dispersion cutoff approximation for various radii parameters. Here,  $R_d$  is the cut-off radius and  $R_c$  is the cluster radius. The first column using the exact potential and the last column for MOBCAL contains the data used to generate Figure 3 in the main article. The relative percent difference between the CCS calculated using exact potential and the approximated potential are shown in Figure S6

| Protein | Number<br>of<br>Atoms | $\sigma_{rel}(\%)$                              | $\sigma_{rel}(\%)$                              | $\sigma_{rel}(\%)$                              |
|---------|-----------------------|-------------------------------------------------|-------------------------------------------------|-------------------------------------------------|
|         |                       | $R_d = 30 \text{ \AA}$<br>$R_c = 3 \text{ \AA}$ | $R_d = 30 \text{ \AA}$<br>$R_c = 6 \text{ \AA}$ | $R_d = 25 \text{ \AA}$<br>$R_c = 6 \text{ \AA}$ |
| 2m1k    | 3402                  | 0.073                                           | 0.103                                           | 0.098                                           |
| 2mwg    | 8272                  | 0.129                                           | 0.030                                           | 0.079                                           |
| 2mz6    | 566                   | 0.000                                           | 0.002                                           | 0.000                                           |
| 4p3v    | 1025                  | 0.000                                           | 0.025                                           | 0.034                                           |
| 4r06    | 4075                  | 0.002                                           | 0.010                                           | 0.025                                           |
| 4r8z    | 3385                  | 0.056                                           | 0.075                                           | 0.088                                           |
| 4rna    | 2504                  | 0.027                                           | 0.026                                           | 0.006                                           |
| 4xmz    | 4200                  | 0.000                                           | 0.022                                           | 0.054                                           |
| 4zn8    | 1735                  | 0.084                                           | 0.042                                           | 0.058                                           |
| 5arm    | 965                   | 0.023                                           | 0.037                                           | 0.025                                           |
| 5b6o    | 4733                  | 0.029                                           | 0.023                                           | 0.093                                           |
| 5fmn    | 1398                  | 0.032                                           | 0.032                                           | 0.088                                           |
| 5h6w    | 3858                  | 0.002                                           | 0.045                                           | 0.034                                           |
| 5ieu    | 1549                  | 0.034                                           | 0.045                                           | 0.005                                           |
| 5iew    | 1096                  | 0.009                                           | 0.010                                           | 0.003                                           |
| 5iir    | 1096                  | 0.004                                           | 0.002                                           | 0.013                                           |
| 5ilg    | 3941                  | 0.057                                           | 0.037                                           | 0.022                                           |
| 5jip    | 9986                  | 0.094                                           | 0.131                                           | 0.055                                           |
| 5lvz    | 1869                  | 0.021                                           | 0.030                                           | 0.033                                           |
| 5lx4    | 3040                  | 0.015                                           | 0.073                                           | 0.044                                           |
| 5mus    | 5151                  | 0.004                                           | 0.040                                           | 0.030                                           |
| 5my9    | 1996                  | 0.017                                           | 0.021                                           | 0.011                                           |
| 5t95    | 4084                  | 0.010                                           | 0.071                                           | 0.044                                           |
| 5ujl    | 4688                  | 0.025                                           | 0.027                                           | 0.012                                           |
| 5x29    | 4710                  | 0.095                                           | 0.164                                           | 0.142                                           |

Table S5: CCS accuracy comparisons for various cut-off radius and cluster sizes for symmetric proteins with the dispersion cut-off approximation invoked. Here,  $\sigma_{rel} = 100 \times |A - B|/B$  with  $B$  being the CCS generated using the exact potential and  $A$  is the CCS generated using the approximate potential.

| Protein | Number<br>of<br>Atoms | $\sigma_{rel}(\%)$                              | $\sigma_{rel}(\%)$                              | $\sigma_{rel}(\%)$                              |
|---------|-----------------------|-------------------------------------------------|-------------------------------------------------|-------------------------------------------------|
|         |                       | $R_d = 30 \text{ \AA}$<br>$R_c = 3 \text{ \AA}$ | $R_d = 30 \text{ \AA}$<br>$R_c = 6 \text{ \AA}$ | $R_d = 25 \text{ \AA}$<br>$R_c = 6 \text{ \AA}$ |
| 2mr8    | 4383                  | 0.006                                           | 0.031                                           | 0.028                                           |
| 2n3u    | 5734                  | 0.042                                           | 0.025                                           | 0.030                                           |
| 2n44    | 652                   | 0.008                                           | 0.016                                           | 0.045                                           |
| 2n9z    | 3830                  | 0.005                                           | 0.005                                           | 0.008                                           |
| 4p2b    | 8162                  | 0.082                                           | 0.072                                           | 0.032                                           |
| 4rlo    | 3262                  | 0.028                                           | 0.086                                           | 0.105                                           |
| 4ub0    | 3539                  | 0.024                                           | 0.024                                           | 0.018                                           |
| 4w6f    | 1176                  | 0.042                                           | 0.038                                           | 0.049                                           |
| 4xol    | 2805                  | 0.020                                           | 0.042                                           | 0.000                                           |
| 4y4q    | 2877                  | 0.027                                           | 0.015                                           | 0.017                                           |
| 4zpf    | 2545                  | 0.073                                           | 0.066                                           | 0.035                                           |
| 5bz0    | 3500                  | 0.045                                           | 0.009                                           | 0.029                                           |
| 5cxv    | 1434                  | 0.032                                           | 0.026                                           | 0.058                                           |
| 5e21    | 3387                  | 0.014                                           | 0.014                                           | 0.008                                           |
| 5h7b    | 3738                  | 0.061                                           | 0.066                                           | 0.086                                           |
| 5imk    | 633                   | 0.024                                           | 0.044                                           | 0.049                                           |
| 5jqf    | 1646                  | 0.001                                           | 0.001                                           | 0.005                                           |
| 5lr1    | 1847                  | 0.032                                           | 0.007                                           | 0.035                                           |
| 5lt8    | 943                   | 0.002                                           | 0.002                                           | 0.073                                           |
| 5pdo    | 7740                  | 0.001                                           | 0.007                                           | 0.039                                           |
| 5uk5    | 3681                  | 0.086                                           | 0.086                                           | 0.016                                           |
| 5viz    | 400                   | 0.002                                           | 0.001                                           | 0.005                                           |
| 5wxg    | 549                   | .013                                            | 0.007                                           | 0.006                                           |
| 5x3l    | 323                   | 0.000                                           | 0.000                                           | 0.001                                           |
| 5yfg    | 2858                  | 0.011                                           | 0.020                                           | 0.044                                           |

Table S6: CCS accuracy comparisons for various cut-off radius and cluster sizes for asymmetric proteins with the dispersion cut-off approximation invoked. Here,  $\sigma_{rel} = 100 \times |A - B|/B$  with  $B$  being the CCS generated using the exact potential and  $B$  is the CCS generated using the approximate potential.

| Protein | No. of Atoms | Radius of Gyration | Exact | CoSIMS (min)                                |                                 |                                 | MOBCAL (min) | Ratio to MOBCAL |      |      |      |
|---------|--------------|--------------------|-------|---------------------------------------------|---------------------------------|---------------------------------|--------------|-----------------|------|------|------|
|         |              |                    |       | $R_d = 30\text{\AA}$<br>$R_c = 3\text{\AA}$ | $30\text{\AA}$<br>$6\text{\AA}$ | $25\text{\AA}$<br>$6\text{\AA}$ |              | A               | B    | C    | D    |
| 2mz6    | 566          | 12.2               | 7.6   | 5.0                                         | 5.8                             | 4.2                             | 41.5         | 5.4             | 8.2  | 7.2  | 9.8  |
| 4p3v    | 1025         | 14.0               | 13.6  | 8.2                                         | 9.5                             | 7.0                             | 95.7         | 7.0             | 11.6 | 10.1 | 13.7 |
| 5iir    | 1096         | 14.9               | 10.0  | 6.3                                         | 7.2                             | 5.5                             | 91.4         | 9.1             | 14.5 | 12.7 | 16.6 |
| 5iew    | 1096         | 14.9               | 9.5   | 6.1                                         | 6.9                             | 5.3                             | 84.6         | 8.9             | 13.8 | 12.3 | 15.9 |
| 5arm    | 965          | 15.8               | 10.8  | 5.5                                         | 6.4                             | 4.5                             | 83.5         | 7.8             | 15.2 | 13.0 | 18.5 |
| 4zn8    | 1735         | 17.8               | 27.3  | 10.9                                        | 12.4                            | 8.3                             | 201.2        | 7.4             | 18.5 | 16.2 | 24.4 |
| 5ieu    | 1549         | 18.4               | 22.5  | 7.2                                         | 8.3                             | 5.3                             | 116.6        | 5.2             | 16.1 | 14.0 | 21.8 |
| 5ujl    | 4688         | 19.1               | 53.7  | 22.0                                        | 25.8                            | 17.9                            | 471.8        | 8.8             | 21.4 | 18.3 | 26.4 |
| 5lvz    | 1869         | 19.3               | 29.3  | 8.8                                         | 10.2                            | 6.5                             | 147.0        | 5.0             | 16.7 | 14.5 | 22.6 |
| 5my9    | 1996         | 19.5               | 34.0  | 9.6                                         | 11.3                            | 7.2                             | 178.5        | 5.2             | 18.7 | 15.9 | 24.9 |
| 5fnn    | 1398         | 20.1               | 16.4  | 6.0                                         | 6.9                             | 4.7                             | 111.9        | 6.8             | 18.5 | 16.1 | 24.0 |
| 2m1k    | 3402         | 20.7               | 66.5  | 13.7                                        | 15.3                            | 9.5                             | 229.0        | 3.4             | 16.7 | 14.9 | 24.1 |
| 5x29    | 4710         | 21.5               | 98.6  | 29.9                                        | 33.4                            | 22.2                            | 641.8        | 6.5             | 21.5 | 19.2 | 28.9 |
| 5lx4    | 3040         | 22.4               | 52.3  | 9.0                                         | 9.4                             | 5.9                             | 202.7        | 3.9             | 22.5 | 21.5 | 34.4 |
| 4r8z    | 3385         | 23.5               | 47.9  | 12.6                                        | 13.8                            | 8.8                             | 348.3        | 7.3             | 27.5 | 25.2 | 39.4 |
| 5ilg    | 3941         | 23.8               | 56.5  | 14.3                                        | 15.5                            | 10.0                            | 416.7        | 7.4             | 29.0 | 26.8 | 41.7 |
| 4rna    | 2504         | 24.3               | 38.0  | 8.2                                         | 8.9                             | 5.7                             | 196.7        | 5.2             | 24.1 | 22.0 | 34.5 |
| 5h6w    | 3858         | 24.6               | 67.9  | 17.4                                        | 18.2                            | 11.8                            | 434.0        | 6.4             | 25.0 | 23.8 | 36.8 |
| 4r06    | 4075         | 24.8               | 69.6  | 15.6                                        | 16.4                            | 10.4                            | 435.0        | 6.3             | 28.0 | 26.6 | 41.9 |
| 5b6o    | 4733         | 25.8               | 105.0 | 20.0                                        | 20.3                            | 13.0                            | 557.0        | 5.3             | 27.8 | 27.4 | 42.9 |
| 4xmz    | 4200         | 26.1               | 61.6  | 14.2                                        | 14.9                            | 9.7                             | 419.2        | 6.8             | 29.6 | 28.1 | 43.3 |
| 5mus    | 5151         | 27.5               | 92.9  | 19.7                                        | 20.1                            | 13.2                            | 649.3        | 7.0             | 32.9 | 32.2 | 49.1 |
| 5jip    | 9986         | 27.5               | 168.4 | 31.7                                        | 34.5                            | 21.5                            | 1101.2       | 6.5             | 34.7 | 31.9 | 51.1 |
| 5t95    | 4084         | 29.1               | 48.6  | 10.5                                        | 11.5                            | 7.4                             | 377.0        | 7.8             | 35.9 | 32.7 | 50.8 |
| 2mwg    | 8272         | 32.8               | 113.6 | 21.8                                        | 23.1                            | 15.2                            | 832.2        | 7.3             | 38.2 | 36.1 | 54.7 |

Table S7: CPU benchmark comparisons for various cut-off radius and cluster sizes for symmetric proteins with the dispersion cut-off approximation invoked. These are instead sorted by increasing CPU ratio. The data used in Columns *A*, *D*, and *E* was used to generate Figure 4 of the main text.



| Protein | No. of Atoms | Radius of Gyration | Exact | CoSIMS (min)                                |                                 |                                 | MOBCAL (min) | Ratio to MOBCAL |      |      |      |
|---------|--------------|--------------------|-------|---------------------------------------------|---------------------------------|---------------------------------|--------------|-----------------|------|------|------|
|         |              |                    |       | $R_d = 30\text{\AA}$<br>$R_c = 3\text{\AA}$ | $30\text{\AA}$<br>$6\text{\AA}$ | $25\text{\AA}$<br>$6\text{\AA}$ |              | A               | B    | C    | D    |
| 5jqf    | 1646         | 9.53               | 6.7   | 6.3                                         | 6.2                             | 5.2                             | 61.4         | 9.2             | 9.8  | 9.9  | 11.7 |
| 5viz    | 400          | 9.76               | 4.8   | 4.0                                         | 4.3                             | 3.4                             | 36.5         | 7.6             | 9.2  | 8.4  | 10.9 |
| 5x3l    | 323          | 9.88               | 2.6   | 2.2                                         | 2.3                             | 2.1                             | 22.9         | 8.9             | 10.3 | 9.9  | 11.1 |
| 2n9z    | 3830         | 11.54              | 7.3   | 5.3                                         | 5.9                             | 4.4                             | 59.4         | 8.2             | 11.1 | 10.1 | 13.6 |
| 5wxg    | 549          | 12.47              | 6.7   | 4.2                                         | 4.8                             | 3.3                             | 38.8         | 5.8             | 9.2  | 8.1  | 11.9 |
| 5e2l    | 3387         | 13.40              | 20.7  | 11.5                                        | 11.5                            | 7.0                             | 104.5        | 5.1             | 9.1  | 9.1  | 15.0 |
| 2mr8    | 4383         | 13.61              | 16.5  | 8.8                                         | 10.1                            | 6.4                             | 103.0        | 6.2             | 11.7 | 10.2 | 16.1 |
| 5pdo    | 7740         | 15.88              | 14.0  | 4.7                                         | 5.6                             | 3.2                             | 123.5        | 8.8             | 26.1 | 22.2 | 38.3 |
| 5lr1    | 1847         | 16.86              | 27.3  | 10.6                                        | 12.1                            | 7.2                             | 180.3        | 6.6             | 17.0 | 14.9 | 25.1 |
| 5yfg    | 2858         | 17.47              | 45.4  | 16.8                                        | 19.5                            | 11.2                            | 262.7        | 5.8             | 15.6 | 13.4 | 23.5 |
| 5lt8    | 943          | 18.81              | 27.6  | 10.4                                        | 10.3                            | 6.1                             | 162.1        | 5.9             | 15.6 | 15.7 | 26.5 |
| 5bz0    | 3500         | 19.49              | 41.3  | 12.7                                        | 14.0                            | 8.2                             | 270.2        | 6.5             | 21.3 | 19.3 | 33.1 |
| 5imk    | 633          | 19.88              | 47.8  | 16.4                                        | 18.7                            | 11.1                            | 321.8        | 6.7             | 19.6 | 17.2 | 28.9 |
| 2n3u    | 5734         | 20.38              | 75.5  | 21.9                                        | 24.8                            | 14.4                            | 441.3        | 5.8             | 20.1 | 17.8 | 30.7 |
| 4zpf    | 2545         | 20.69              | 46.0  | 12.7                                        | 14.0                            | 8.1                             | 296.5        | 6.4             | 23.3 | 21.2 | 36.5 |
| 4y4q    | 2877         | 22.11              | 42.1  | 11.0                                        | 12.2                            | 7.0                             | 300.3        | 7.1             | 27.3 | 24.6 | 42.7 |
| 2n44    | 652          | 22.62              | 86.1  | 24.5                                        | 26.5                            | 15.4                            | 600.8        | 7.0             | 24.5 | 22.7 | 39.1 |
| 4ub0    | 3539         | 24.04              | 47.5  | 13.6                                        | 13.0                            | 7.7                             | 350.7        | 7.4             | 25.8 | 27.0 | 45.5 |
| 4w6f    | 1176         | 25.88              | 48.3  | 11.6                                        | 12.5                            | 7.3                             | 346.0        | 7.2             | 29.9 | 27.6 | 47.6 |
| 4xol    | 2805         | 27.26              | 10.7  | 3.5                                         | 3.9                             | 2.5                             | 101.6        | 9.5             | 29.1 | 25.9 | 40.2 |
| 5cxv    | 1434         | 28.48              | 49.4  | 10.0                                        | 10.5                            | 6.1                             | 334.8        | 6.8             | 33.4 | 31.9 | 54.9 |
| 4rlo    | 3262         | 28.86              | 122.2 | 22.1                                        | 23.9                            | 13.6                            | 789.5        | 6.5             | 35.7 | 33.0 | 58.0 |
| 4p2b    | 8162         | 30.50              | 57.2  | 9.5                                         | 9.9                             | 5.8                             | 345.3        | 6.0             | 36.4 | 35.0 | 60.0 |
| 5h7b    | 3738         | 38.44              | 69.5  | 8.8                                         | 8.3                             | 5.3                             | 237.7        | 3.4             | 26.9 | 28.6 | 44.8 |
| 5uk5    | 3681         | 45.51              | 35.7  | 4.7                                         | 4.6                             | 2.9                             | 218.7        | 6.1             | 46.6 | 47.8 | 76.0 |

Table S8: CPU benchmark comparisons for various cut-off radius and cluster sizes for asymmetric proteins with the dispersion cut-off approximation invoked. These are instead sorted by increasing CPU ratio. The data used in Columns *A*, *D*, and *E* was used to generate Figure 4 of the main text.

## S8 Comparison to Other TM Based Software

In this section, we compare CoSIMS to 3 other recently published trajectory method CCS software; IMoS<sup>1</sup>, Collidoscope<sup>2</sup>, and HPCCS<sup>3</sup>. Each program was run on the same CPU architecture as noted in the main text. Only A-form DNA strands were used, as MOBCAL provided the least amount of errors in terms of CCS accuracy (see the main text and Figure 5 for more details).

Each program was run with their settings kept at the default values except for the number of trajectories. An additional change was also made for Collidoscope (see below) in order to generate an error bar for the program's CCS. A total of 10 CCS integrals were computed with each software with a chosen number of total trajectories as to achieve a similar average percent error over all 19 different strands. Collidoscope did not have any direct way of choosing the number of trajectories. The total number of trajectories and their average percent error for each program is as follows:

| <b>Software</b>     | <b>Number of Trajectories</b>             | <b>Average Percent Error</b> |
|---------------------|-------------------------------------------|------------------------------|
| <b>MOBCAL</b>       | 100,000                                   | 0.60 %                       |
| <b>CoSIMS</b>       | 250,000                                   | 0.56 %                       |
| <b>IMoS</b>         | 100,000                                   | 0.56 %                       |
| <b>Collidoscope</b> | 280,000-560,000 depending on the molecule | 0.98 %                       |
| <b>HPCCS</b>        | 1,000,000                                 | 0.89 %                       |

The total CPU time required to run 10 CCS calculations on a single core and on 16 cores is presented in Figures S7 and S8 and the average CCS is compared to CoSIMS in Figures S9-S11. IMoS and HPCCS are Monte-Carlo based programs, so no changes to their settings needed to be made except for the number of trajectories. Collidoscope uses a Riemann sum for their integration and each program call produces the same integral evaluation for a given molecule. To measure the error between each integral evaluation, their spherical “vantage points” were chosen randomly instead of using a discrete spherical grid provided by the program. All other settings for Collidoscope were kept as default.

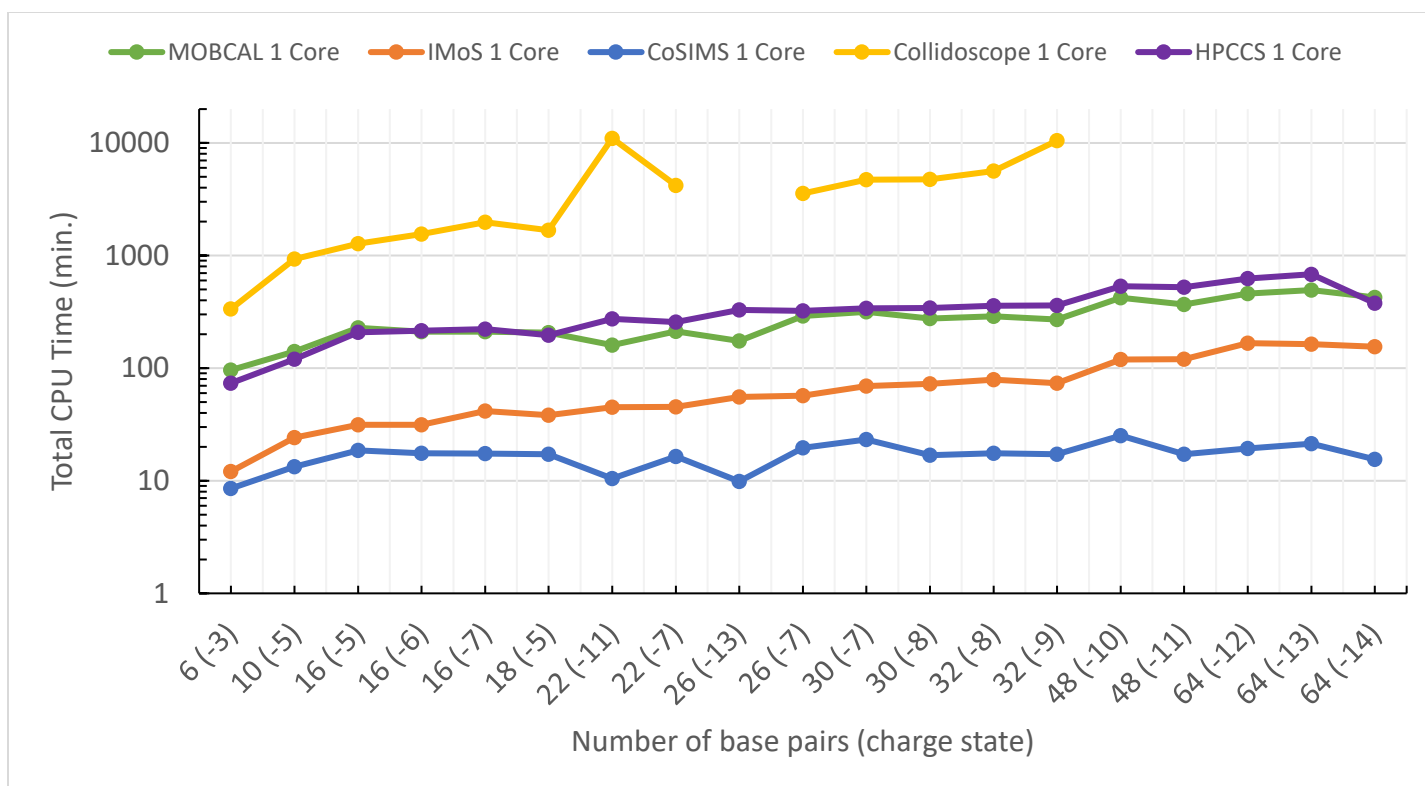

Figure S7: CPU runtimes for all five trajectory method programs tested run on a single CPU core. The gaps in the graph for Collidoscope are due to stopping the program after 24 hours of runtime.

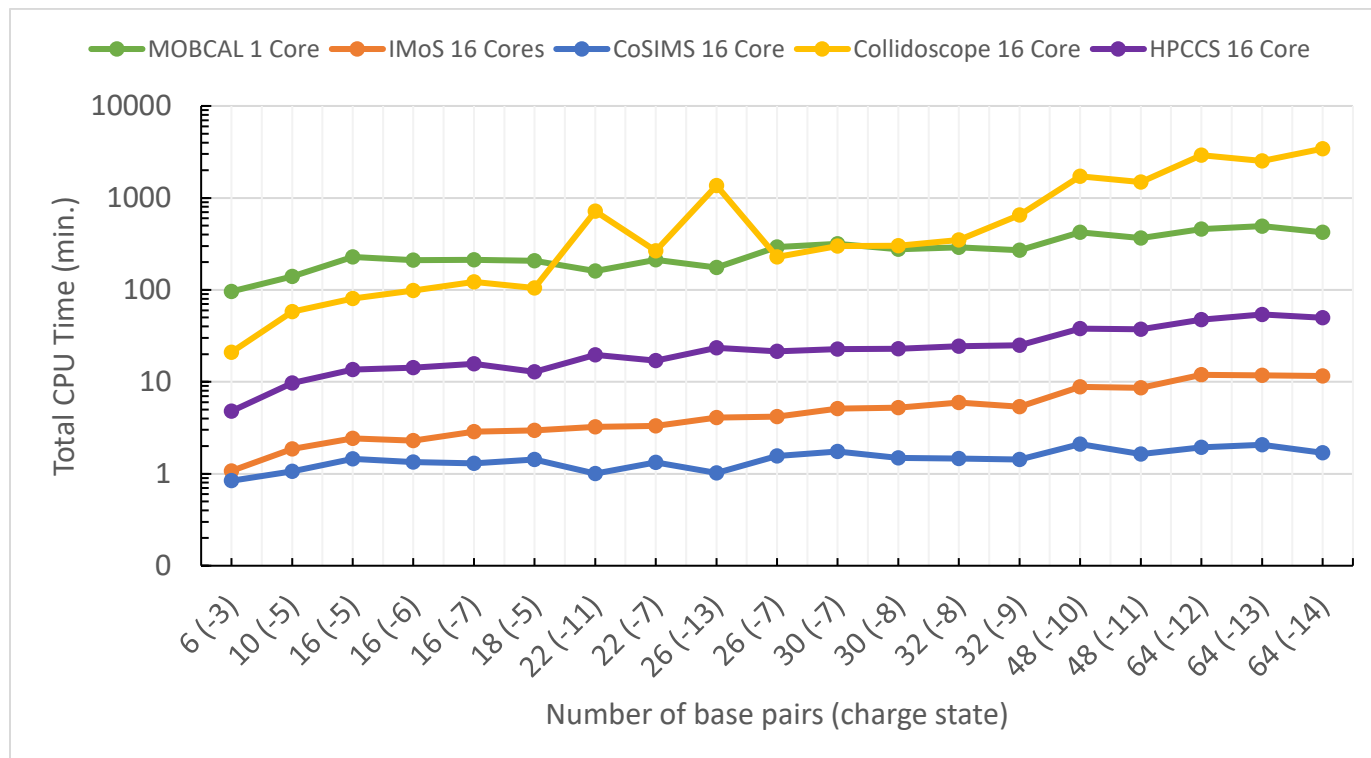

Figure S8: CPU runtimes for all five trajectory methods programs tested run on 16 CPU cores, with the exception of MOBCAL which can only run on one core.

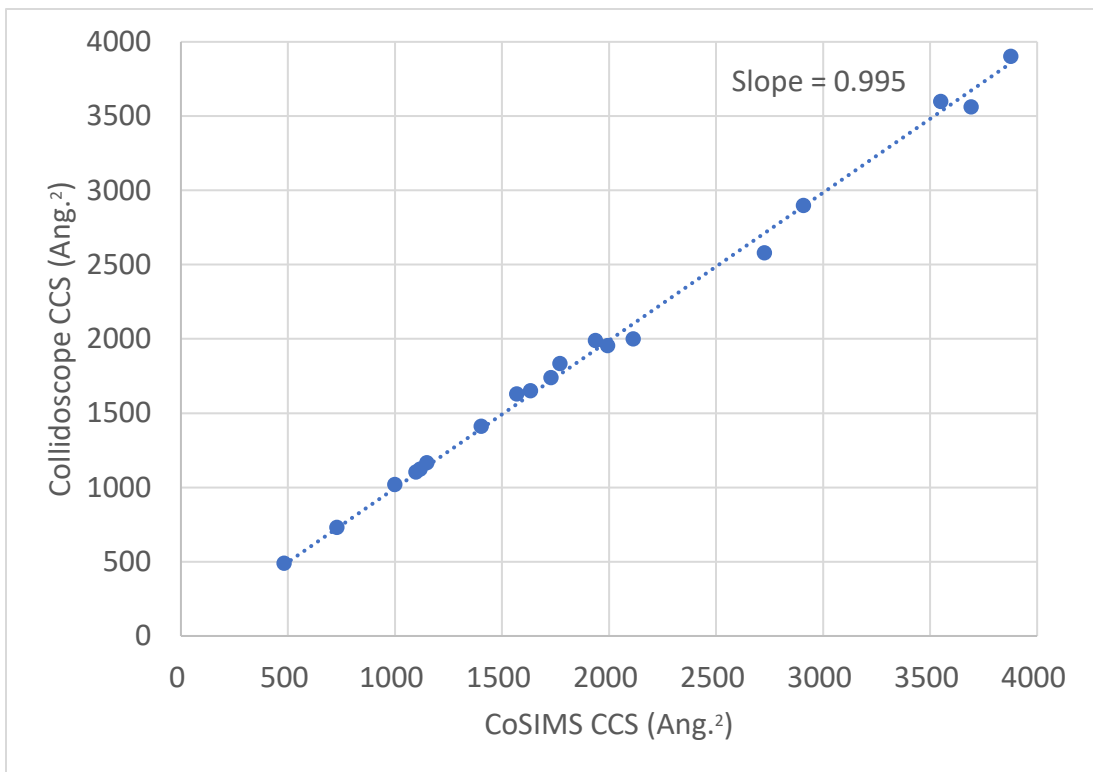

Figure S9: CoSIMS CCS vs Collidoscope CCS for A-form DNA strands.

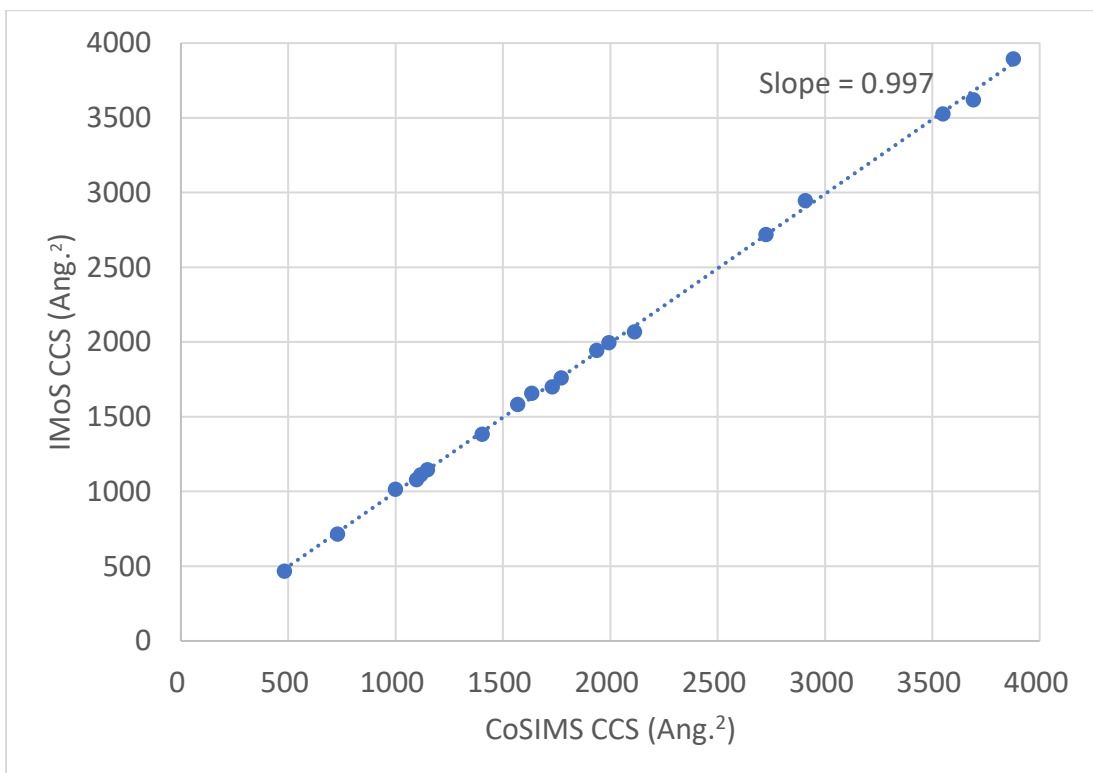

Figure S10: CoSIMS CCS vs IMoS CCS for A-form DNA strands.

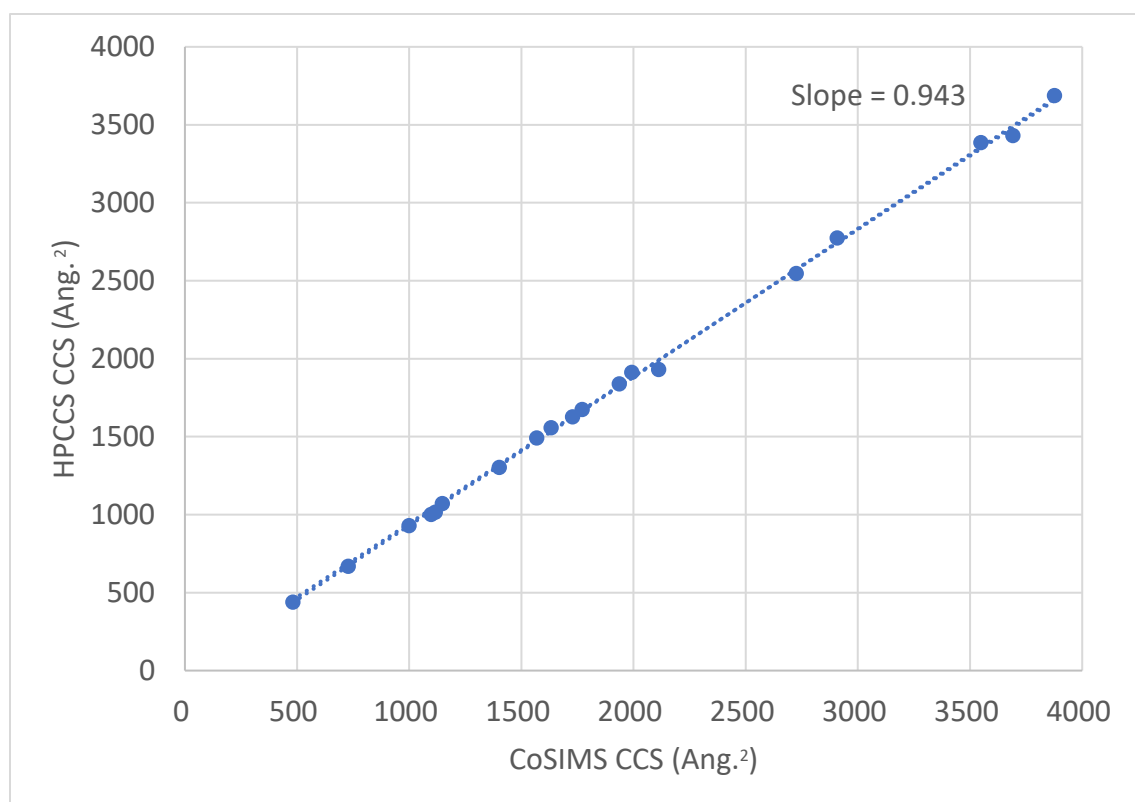

Figure S11: CoSIMS CCS vs HPCCS CCS for A-form DNA strands.

## References

- 1) Larriba, C.; Hogan, C. J. Free Molecular Collision Cross Section Calculation Methods for Nanoparticles and Complex Ions with Energy Accommodation. *J. Comput. Phys.* 2013, 251, 344 – 363.
- 2) Ewing, S. A.; Donor, M. T.; Wilson, J. W.; Prell, J. S. Collidoscope: An Improved Tool for Computing Collisional Cross-Sections with the Trajectory Method. *J. Am. Soc. Mass Spectrom.* 2017, 28, 587-596.
- 3) Zanotto, L.; Heerdt, G.; Souza, P. C. T.; Araujo, G.; Skaf, M. S. High Performance Collision Cross Section Calculation-HPCCS. *J. Comput. Chem.* 2018, 39, 1675-1681.
